# Supplementary material
Source: HighWire-hosted journal article supplement (https://gut.bmj.com/content/71/9/1919.2)
Supplement: inline-supplementary-material-2 [file inline-supplementary-material-2.pdf]

|                  | IFX           | IFX +<br>thiopurines | VDZ           | Healthy control<br>group (used in<br>MSD assay) | Healthy control group<br>(used in ELISA and<br>neutralisation assay) |
|------------------|---------------|----------------------|---------------|-------------------------------------------------|----------------------------------------------------------------------|
| Number           | 13            | 15                   | 27            | 80                                              | 36                                                                   |
| Mean age<br>(SD) | 30.41 (17.29) | 25.31 (15.89)        | 41.21 (17.62) | 39.76 (11.66)                                   | 41.33 (12.91)                                                        |
| Male (%)         | 2 (15.4)      | 7 (46.7)             | 9 (33.3)      | 19 (23.8)                                       | 29 (80.6)                                                            |
| CD (%)           | 9 (69.2)      | 11 (73.3)            | 8 (30.8)      | 0 (0.0)                                         | 0 (0.0)                                                              |
| IBD-U (%)        | 0 (0.0)       | 0 (0.0)              | 1 (3.8)       | 0 (0.0)                                         | 0 (0.0)                                                              |
| UC (%)           | 4 (30.8)      | 4 (26.7)             | 17 (65.4)     | 0 (0.0)                                         | 0 (0.0)                                                              |
